# Supplementary material for: Meteorin Is a Novel Therapeutic Target for Wet Age-Related Macular Degeneration
Source: MDPI journal article supplement (doi:10.3390/jcm10132973), 2021-07-02
Supplement: s1 [file s1]

supplementary Table 1 DE genes RPE/Choroid

| FeatureID      | EntrezID                                                                                    | Gene Name                                           | TranscriptType | GeneBiotype    | logFC              | FC                     | PValue                 | FDR                  | Status               |
|----------------|---------------------------------------------------------------------------------------------|-----------------------------------------------------|----------------|----------------|--------------------|------------------------|------------------------|----------------------|----------------------|
| AABR07028639.1 | <a href="https://www.ncbi.nlm.nih.gov/gene/2-term:NA target=">blank"> NA </a>               | NA                                                  | NA             | NA             | -1.84828071812607  | -3.6007082731498       | 0.000130478864278073   | 0.0255639602142729   | Down in EPR_Meteorin |
| AABR07028639.1 | <a href="https://www.ncbi.nlm.nih.gov/gene/2-term:NA target=">blank"> NA </a>               | NA                                                  | NA             | NA             | 1.6564010550231    | 3.1522917284884        | 0.20730796248484e-05   | 0.0074789276868377   | Up in EPR_Meteorin   |
| AABR0702907.2  | <a href="https://www.ncbi.nlm.nih.gov/gene/2-term:NA target=">blank"> NA </a>               | NA                                                  | NA             | NA             | -7.7330102714488   | -212.74924872318       | 4.45536887874854e-05   | 0.0281829273206      | Down in EPR_Meteorin |
| AABR0704711.1  | <a href="https://www.ncbi.nlm.nih.gov/gene/2-term:NA target=">blank"> NA </a>               | NA                                                  | NA             | NA             | -0.840892576196551 | -1.79115796466991      | 7.44431137160214e-06   | 0.0033030856350852   | Down in EPR_Meteorin |
| AABR07052523.1 | <a href="https://www.ncbi.nlm.nih.gov/gene/2-term:NA target=">blank"> NA </a>               | NA                                                  | NA             | NA             | -1.24115698871856  | -2.36380030855028      | 2.74158369074309e-06   | 0.0016967456396048   | Down in EPR_Meteorin |
| AABR07057438.1 | <a href="https://www.ncbi.nlm.nih.gov/gene/2-term:NA target=">blank"> NA </a>               | NA                                                  | NA             | NA             | -5.129047592428584 | -34.9942890315887      | 0.00019703472526984    | 0.0333984982881201   | Down in EPR_Meteorin |
| AABR0703246.1  | <a href="https://www.ncbi.nlm.nih.gov/gene/2-term:NA target=">blank"> NA </a>               | NA                                                  | NA             | NA             | 2.61933849119444   | 6.1448626010382        | 2.5626044312791e-05    | 0.008590898896033    | Up in EPR_Meteorin   |
| Acbg2          | <a href="https://www.ncbi.nlm.nih.gov/gene/2-term:31282 target=">blank"> 31282 </a>         | ATP binding cassette subfamily G member 2           | protein_coding | protein_coding | 2.04479219986699   | 4.1261386162105        | 0.0042936838503638     | 0.0387502407187595   | Up in EPR_Meteorin   |
| AC108574.1     | <a href="https://www.ncbi.nlm.nih.gov/gene/2-term:NA target=">blank"> NA </a>               | NA                                                  | NA             | NA             | 1.0158582096215    | 2.02210585255868       | 6.98513698958496e-06   | 0.0031772281093504   | Up in EPR_Meteorin   |
| Acer2          | <a href="https://www.ncbi.nlm.nih.gov/gene/2-term:313339 target=">blank"> 313339 </a>       | alkaline ceramidase 2                               | protein_coding | protein_coding | 1.30495672900371   | 2.47076316712509       | 9.18392647432606e-06   | 0.0037486371565317   | Up in EPR_Meteorin   |
| Adgr4          | <a href="https://www.ncbi.nlm.nih.gov/gene/2-term:64124 target=">blank"> 64124 </a>         | adhesion G protein-coupled receptor L4              | NA             | NA             | 1.17621971042658   | 2.25983856750705       | 0.00023628741023234    | 0.036748782172836    | Up in EPR_Meteorin   |
| Alpl1          | <a href="https://www.ncbi.nlm.nih.gov/gene/2-term:59110 target=">blank"> 59110 </a>         | aryl hydrocarbon receptor-interacting protein-like  | protein_coding | protein_coding | -2.02239351432992  | -4.06409327853152      | 0.000163008314082022   | 0.029487898685758    | Down in EPR_Meteorin |
| Alplv0e2       | <a href="https://www.ncbi.nlm.nih.gov/gene/2-term:436582 target=">blank"> 436582 </a>       | ATPase, H+ transporting V0 subunit e2               | protein_coding | protein_coding | -1.037919157819854 | -2.0235916730699       | 3.20593396455620e-06   | 0.0100758261937833   | Down in EPR_Meteorin |
| Alplv1b2       | <a href="https://www.ncbi.nlm.nih.gov/gene/2-term:117596 target=">blank"> 117596 </a>       | ATPase H+ transporting V1 subunit B2                | protein_coding | protein_coding | -0.889492004104825 | -1.85252370583026      | 1.52734103131239e-05   | 0.005763666958408    | Down in EPR_Meteorin |
| Calm4          | <a href="https://www.ncbi.nlm.nih.gov/gene/2-term:691455 target=">blank"> 691455 </a>       | calmodulin-like 4                                   | protein_coding | protein_coding | -1.3563982236388   | -2.560451567961419e-05 | 0.011108228422366      | 0.009656720550963    | Down in EPR_Meteorin |
| Ccnj           | <a href="https://www.ncbi.nlm.nih.gov/gene/2-term:294053 target=">blank"> 294053 </a>       | cyclojin 5                                          | protein_coding | protein_coding | 8.0107748549131    | 257.81910907397        | 2.13173731016284e-05   | 0.0074789276868377   | Up in EPR_Meteorin   |
| Cdh11          | <a href="https://www.ncbi.nlm.nih.gov/gene/2-term:84407 target=">blank"> 84407 </a>         | cadherin 11                                         | protein_coding | protein_coding | 0.9449593564077596 | 1.9251334560562        | 1.6082967933217e-06    | 0.012679482712028    | Up in EPR_Meteorin   |
| Cers1          | <a href="https://www.ncbi.nlm.nih.gov/gene/2-term:290559 target=">blank"> 290559 </a>       | ceramide synthase 1                                 | protein_coding | protein_coding | 21.3059845782098   | 259269242174806        | 1.33471587293363e-06   | 0.00111404996122474  | Up in EPR_Meteorin   |
| Ckmt           | <a href="https://www.ncbi.nlm.nih.gov/gene/2-term:29593 target=">blank"> 29593 </a>         | creatine kinase, mitochondrial 1                    | NA             | NA             | -1.57510540893866  | -2.97957261937287      | 0.00022426392871848    | 0.036320673395388    | Down in EPR_Meteorin |
| Clt1           | <a href="https://www.ncbi.nlm.nih.gov/gene/2-term:83800 target=">blank"> 83800 </a>         | clathrin, light chain A                             | protein_coding | protein_coding | -0.75026387823745  | -1.68209978102979      | 0.00033642139377074    | 0.047432268187133    | Down in EPR_Meteorin |
| Crx            | <a href="https://www.ncbi.nlm.nih.gov/gene/2-term:60446 target=">blank"> 60446 </a>         | cone-rod homeobox                                   | protein_coding | protein_coding | -2.5513564137402   | -6.86188445651031      | 2.76152382992715e-05   | 0.009556975505963    | Down in EPR_Meteorin |
| Ctnna2         | <a href="https://www.ncbi.nlm.nih.gov/gene/2-term:297357 target=">blank"> 297357 </a>       | catenin alpha 2                                     | protein_coding | protein_coding | -2.36400170461928  | -5.1476903717878       | 3.64940415265407e-06   | 0.010667620503681    | Down in EPR_Meteorin |
| Dapl1          | <a href="https://www.ncbi.nlm.nih.gov/gene/2-term:362136 target=">blank"> 362136 </a>       | death associated protein 1                          | protein_coding | protein_coding | -0.3011567022367   | -4.92852759010921      | 0.000152620176479814   | 0.0281522917770906   | Down in EPR_Meteorin |
| Dnaase2b       | <a href="https://www.ncbi.nlm.nih.gov/gene/2-term:59296 target=">blank"> 59296 </a>         | deoxyribonuclease 2 beta                            | protein_coding | protein_coding | -3.0603279304077   | -8.3586696326393       | 6.4075502956766e-05    | 0.0160411550252741   | Down in EPR_Meteorin |
| Dusp7          | <a href="https://www.ncbi.nlm.nih.gov/gene/2-term:300980 target=">blank"> 300980 </a>       | dual specificity phosphatase 7                      | protein_coding | protein_coding | 0.840895769670012  | 1.79111723491152       | 4.5617892278807e-06    | 0.00237307421695891  | Up in EPR_Meteorin   |
| Ebf1           | <a href="https://www.ncbi.nlm.nih.gov/gene/2-term:116543 target=">blank"> 116543 </a>       | ETS transcription factor 1                          | protein_coding | protein_coding | 0.887394365373747  | 1.84983214474515       | 9.79435233830413e-05   | 0.021108228422366    | Up in EPR_Meteorin   |
| Echs1          | <a href="https://www.ncbi.nlm.nih.gov/gene/2-term:140547 target=">blank"> 140547 </a>       | enoyl-CoA hydratase, short chain 1                  | protein_coding | protein_coding | -1.1392504600024   | -2.02066584215823      | 0.00018262100223034    | 0.031312397064282    | Down in EPR_Meteorin |
| Eno3           | <a href="https://www.ncbi.nlm.nih.gov/gene/2-term:366270 target=">blank"> 366270 </a>       | enolase 3                                           | protein_coding | protein_coding | 0.97307740438091   | 1.96302349551108       | 6.1371008701612e-05    | 0.0156922540779379   | Up in EPR_Meteorin   |
| Enh1           | <a href="https://www.ncbi.nlm.nih.gov/gene/2-term:24333 target=">blank"> 24333 </a>         | enhancer 1                                          | protein_coding | protein_coding | -0.922522325080092 | -1.88997685928325      | 2.16296043675826e-06   | 0.014832009626016    | Down in EPR_Meteorin |
| Eno2           | <a href="https://www.ncbi.nlm.nih.gov/gene/2-term:24334 target=">blank"> 24334 </a>         | enolase 2                                           | protein_coding | protein_coding | -1.27641206915051  | -2.42235944519555      | 4.61459113694832e-08   | 5.35505553015403e-05 | Down in EPR_Meteorin |
| Erp            | <a href="https://www.ncbi.nlm.nih.gov/gene/2-term:170909 target=">blank"> 170909 </a>       | ETS transcription factor ERQ                        | protein_coding | protein_coding | 1.17185954948084   | 2.25306303525935       | 3.7117614795358e-06    | 0.0019998404000413   | Up in EPR_Meteorin   |
| Esrp           | <a href="https://www.ncbi.nlm.nih.gov/gene/2-term:299219 target=">blank"> 299219 </a>       | estrogen-related receptor beta                      | protein_coding | protein_coding | -2.84108913036541  | -7.16568004162378      | 4.78377759386877e-06   | 0.00240560226529724  | Down in EPR_Meteorin |
| F13a1          | <a href="https://www.ncbi.nlm.nih.gov/gene/2-term:60327 target=">blank"> 60327 </a>         | coagulation factor XIII A1 chain                    | protein_coding | protein_coding | -1.55943114183241  | -2.9473759927187       | 5.97238649353543e-05   | 0.0156922540779379   | Down in EPR_Meteorin |
| F2r            | <a href="https://www.ncbi.nlm.nih.gov/gene/2-term:25439 target=">blank"> 25439 </a>         | coagulation factor II (thrombin) receptor           | protein_coding | protein_coding | 1.4052838085646    | 6.24914788216249       | 6.00007624380368e-06   | 0.00282868690410803  | Up in EPR_Meteorin   |
| Fam169a        | <a href="https://www.ncbi.nlm.nih.gov/gene/2-term:31013 target=">blank"> 31013 </a>         | family with sequence similarity 169, member A       | protein_coding | protein_coding | -1.53954410432281  | -2.9070283357297       | 0.00016784851714838    | 0.0297139834999511   | Down in EPR_Meteorin |
| Fam80b         | <a href="https://www.ncbi.nlm.nih.gov/gene/2-term:361441 target=">blank"> 361441 </a>       | family with sequence similarity 89, member A        | protein_coding | protein_coding | -2.38794341198252  | -5.23410098039616      | 0.00241752831577303    | 0.0235666568038221   | Down in EPR_Meteorin |
| Fdft1          | <a href="https://www.ncbi.nlm.nih.gov/gene/2-term:29580 target=">blank"> 29580 </a>         | farnesyl diphosphate farnesyl transferase 1         | protein_coding | protein_coding | -0.73087890498253  | -1.65964964318959      | 0.00026621261401012    | 0.0423474759798488   | Down in EPR_Meteorin |
| Fgfs           | <a href="https://www.ncbi.nlm.nih.gov/gene/2-term:362402 target=">blank"> 362402 </a>       | FYVE, RhoGEP and PH domain containing 5             | protein_coding | protein_coding | 0.95585653173752   | 1.99428417349355       | 0.000112074388116607   | 0.0235666568038221   | Up in EPR_Meteorin   |
| Fkbp5          | <a href="https://www.ncbi.nlm.nih.gov/gene/2-term:361819 target=">blank"> 361819 </a>       | FKBP prolyl isomerase 5                             | protein_coding | protein_coding | 1.8280681107068    | 3.55080805001127       | 3.25982379697933e-05   | 9.1265869687169e-08  | Up in EPR_Meteorin   |
| Fmo2           | <a href="https://www.ncbi.nlm.nih.gov/gene/2-term:246245 target=">blank"> 246245 </a>       | flavin containing dimethylalanine monooxygenase 2   | protein_coding | protein_coding | 2.17856740485821   | 4.62703810143509       | 6.56953260014895e-06   | 0.0362737525203575   | Up in EPR_Meteorin   |
| Opd            | <a href="https://www.ncbi.nlm.nih.gov/gene/2-term:24377 target=">blank"> 24377 </a>         | glucose-6-phosphate dehydrogenase                   | protein_coding | protein_coding | -0.849468785360072 | -1.80183485078228      | 0.00026026872371088    | 0.0393578002610021   | Down in EPR_Meteorin |
| Opf6           | <a href="https://www.ncbi.nlm.nih.gov/gene/2-term:408206 target=">blank"> 408206 </a>       | gamma-glutamyl transferase 6                        | protein_coding | protein_coding | -2.2970687966548   | -4.61456524139888      | 0.00021448022624262    | 0.0358784801093923   | Down in EPR_Meteorin |
| Opip           | <a href="https://www.ncbi.nlm.nih.gov/gene/2-term:25040 target=">blank"> 25040 </a>         | gastric inhibitory polypeptide                      | protein_coding | protein_coding | -2.30139358115728  | -4.813227469418        | 1.0529281473471729e-08 | 1.58844745020357e-05 | Down in EPR_Meteorin |
| Ornt1          | <a href="https://www.ncbi.nlm.nih.gov/gene/2-term:363143 target=">blank"> 363143 </a>       | G protein subunit alpha transducin 1                | protein_coding | protein_coding | -2.01763849475428  | -4.30984862350695      | 0.000119984574897387   | 0.0234440023844834   | Down in EPR_Meteorin |
| Orst1          | <a href="https://www.ncbi.nlm.nih.gov/gene/2-term:81780 target=">blank"> 81780 </a>         | G protein-coupled receptor kinase 1                 | protein_coding | protein_coding | -2.36055934042488  | -5.15951847419147      | 0.000260379886935058   | 0.0396379374968759   | Down in EPR_Meteorin |
| Gsk1           | <a href="https://www.ncbi.nlm.nih.gov/gene/2-term:24426 target=">blank"> 24426 </a>         | glutathione S-transferase pi 1                      | protein_coding | protein_coding | -1.1917400989369   | -2.28429505262971      | 2.92426001787767e-06   | 0.0016967456396048   | Down in EPR_Meteorin |
| Hes1           | <a href="https://www.ncbi.nlm.nih.gov/gene/2-term:29577 target=">blank"> 29577 </a>         | heparin binding EGF-like transcription factor 1     | protein_coding | protein_coding | 0.972181371902703  | 1.96180462549665       | 0.000120782228574054   | 0.0243440023844834   | Up in EPR_Meteorin   |
| Hsp1           | <a href="https://www.ncbi.nlm.nih.gov/gene/2-term:79242 target=">blank"> 79242 </a>         | 15-hydroxyprostanoid dehydrogenase                  | protein_coding | protein_coding | -0.41986836823576  | -16.2212717185999      | 1.82149223932675e-02   | 9.1596743122891e-39  | Down in EPR_Meteorin |
| Hsp1b3         | <a href="https://www.ncbi.nlm.nih.gov/gene/2-term:24472 target=">blank"> 24472 </a>         | heat shock protein family A (Hsp70) member 1B       | protein_coding | protein_coding | 0.86973765279948   | 1.65853345700909       | 0.00025415307211129    | 0.03957550240716795  | Up in EPR_Meteorin   |
| Igf2bp3        | <a href="https://www.ncbi.nlm.nih.gov/gene/2-term:24484 target=">blank"> 24484 </a>         | insulin-like growth factor binding protein 3        | protein_coding | protein_coding | 1.23692319099854   | 2.35695333123968       | 6.592544847347127e-05  | 0.0160411550252741   | Up in EPR_Meteorin   |
| Kcne2          | <a href="https://www.ncbi.nlm.nih.gov/gene/2-term:171138 target=">blank"> 171138 </a>       | potassium voltage-gated channel subfamily E reg     | protein_coding | protein_coding | -1.74920083598242  | -3.3617429368374       | 2.47557686287784e-05   | 0.008485285304288    | Down in EPR_Meteorin |
| Kcnj14         | <a href="https://www.ncbi.nlm.nih.gov/gene/2-term:276720 target=">blank"> 276720 </a>       | potassium inwardly-rectifying channel, subfamily J  | protein_coding | protein_coding | -2.4290687169535   | -5.38545702716459      | 2.11449002275853e-05   | 0.0074789276868377   | Down in EPR_Meteorin |
| Kir9           | <a href="https://www.ncbi.nlm.nih.gov/gene/2-term:117560 target=">blank"> 117560 </a>       | Kruppel-like family 9                               | protein_coding | protein_coding | 1.2017469739825    | 2.3001803354035        | 3.0791553594433e-05    | 0.011007475399537    | Up in EPR_Meteorin   |
| Lamp3          | <a href="https://www.ncbi.nlm.nih.gov/gene/2-term:303801 target=">blank"> 303801 </a>       | lysosomal-associated membrane protein 3             | protein_coding | protein_coding | -0.06307878406616  | -8.35754828019005      | 0.00015302189966203    | 0.0281522917770906   | Down in EPR_Meteorin |
| Ldha           | <a href="https://www.ncbi.nlm.nih.gov/gene/2-term:24533 target=">blank"> 24533 </a>         | lactate dehydrogenase A                             | protein_coding | protein_coding | -1.1665738617745   | -2.2447869592163       | 1.25126831229672e-06   | 0.0196475275971093   | Down in EPR_Meteorin |
| LOC100364082   | <a href="https://www.ncbi.nlm.nih.gov/gene/2-term:100364082 target=">blank"> 100364082 </a> | Mg pyruvate kinase-like                             | NA             | NA             | -1.1827859240705   | -2.27011213139668      | 7.665950869382227e-06  | 0.0033042248970301   | Down in EPR_Meteorin |
| LOC100917225   | <a href="https://www.ncbi.nlm.nih.gov/gene/2-term:100917225 target=">blank"> 100917225 </a> | 6-phosphofructo-2-kinase/fructose-2,6-bisphospho    | NA             | NA             | -6.93924597956613  | -122.730157049683      | 0.00001830022300169    | 0.0358784801093923   | Down in EPR_Meteorin |
| LOC100912399   | <a href="https://www.ncbi.nlm.nih.gov/gene/2-term:100912399 target=">blank"> 100912399 </a> | mitogen-activated protein kinase kinase kinase 14   | protein_coding | protein_coding | 20.5288256666443   | 1512837.46556109       | 3.23482096358917e-06   | 0.00180742826135949  | Up in EPR_Meteorin   |
| LOC10256337    | <a href="https://www.ncbi.nlm.nih.gov/gene/2-term:10256337 target=">blank"> 10256337 </a>   | mitochondrial fusion factor-like                    | protein_coding | protein_coding | -2.5310593209068   | -5.77993148858034      | 1.93197555528334e-08   | 2.6496165700041e-05  | Down in EPR_Meteorin |
| LOC10348005    | <a href="https://www.ncbi.nlm.nih.gov/gene/2-term:108348055 target=">blank"> 108348055 </a> | B6 domain-containing protein 1                      | NA             | NA             | -7.6765565897103   | -190.897710254151      | 6.4946212519021e-05    | 0.001141050227418    | Down in EPR_Meteorin |
| LOC10361137    | <a href="https://www.ncbi.nlm.nih.gov/gene/2-term:108351137 target=">blank"> 108351137 </a> | glyceraldehyde 3-phosphate dehydrogenase            | NA             | NA             | -0.80909304211234  | -1.7530939386015       | 0.000309364497199554   | 0.0448757000413451   | Down in EPR_Meteorin |
| LOC85431       | <a href="https://www.ncbi.nlm.nih.gov/gene/2-term:685431 target=">blank"> 685431 </a>       | similar to Alpha-enolase (2-phospho-D-glycerate     | pseudogene     | pseudogene     | -1.08381759634975  | -2.11963755916294      | 2.46808447443531e-06   | 0.0161848478149059   | Down in EPR_Meteorin |
| Map3k4         | <a href="https://www.ncbi.nlm.nih.gov/gene/2-term:313022 target=">blank"> 313022 </a>       | mitogen-activated protein kinase kinase kinase 6    | protein_coding | protein_coding | 2.03241460953591   | 4.0908961559582        | 4.0086741695541e-08    | 5.0395715663733e-05  | Up in EPR_Meteorin   |
| Marcks         | <a href="https://www.ncbi.nlm.nih.gov/gene/2-term:25603 target=">blank"> 25603 </a>         | myristoylated alanine rich protein kinase C substra | protein_coding | protein_coding | 0.78719462777554   | 1.7257157633049        | 0.000164190872760995   | 0.029487898685758    | Up in EPR_Meteorin   |
| Mapk3          | <a href="https://www.ncbi.nlm.nih.gov/gene/2-term:287382 target=">blank"> 287382 </a>       | microfilin associated protein 4                     | NA</           |                |                    |                        |                        |                      |                      |

Supplementary Table 2 DE genes Retina

| Accession    | Gene Name                                                                                                      | Transcript Type | GeneSymbol     | logFC              | FC                  | Pvalue                 | FDR                  | Status                |
|--------------|----------------------------------------------------------------------------------------------------------------|-----------------|----------------|--------------------|---------------------|------------------------|----------------------|-----------------------|
| AB07014236.1 | ca href="https://www.ncbi.nlm.nih.gov/gene/267041" target="_blank">"AB07014236.1" target="_blank">AB07014236.1 | NA              | NA             | -1.0746555490785   | -2.1052117048320229 | 7.3124163371074e-15    | 2.56035056250723e-11 | Down in NR1_Metformin |
| AB07014243.1 | ca href="https://www.ncbi.nlm.nih.gov/gene/267041" target="_blank">"AB07014243.1" target="_blank">AB07014243.1 | NA              | NA             | 0.78679230320938   | 1.70284343051992    | 2.7898638463026e-08    | 2.51387643090326e-05 | Up in NR1_Metformin   |
| AB07014275.1 | ca href="https://www.ncbi.nlm.nih.gov/gene/267041" target="_blank">"AB07014275.1" target="_blank">AB07014275.1 | NA              | NA             | 1.6793389303076    | 3.20381119911       | 0.00096777666272039    | 0.242021903364842    | Up in NR1_Metformin   |
| AB07033275.1 | ca href="https://www.ncbi.nlm.nih.gov/gene/267041" target="_blank">"AB07033275.1" target="_blank">AB07033275.1 | NA              | NA             | 1.60588973722033   | 3.0438361176196     | 1.78214818872214e-08   | 2.76331873302971e-05 | Up in NR1_Metformin   |
| AB07033461.1 | ca href="https://www.ncbi.nlm.nih.gov/gene/267041" target="_blank">"AB07033461.1" target="_blank">AB07033461.1 | NA              | NA             | -0.80227145627355  | -2.7102995747731    | 0.00114230864287449    | 0.218714671057105    | Down in NR1_Metformin |
| AB07044602.2 | ca href="https://www.ncbi.nlm.nih.gov/gene/267041" target="_blank">"AB07044602.2" target="_blank">AB07044602.2 | NA              | NA             | -0.99148429785725  | -1.9862394089757    | 0.0006752680544969     | 0.04552505597703     | Down in NR1_Metformin |
| AB07045021.2 | ca href="https://www.ncbi.nlm.nih.gov/gene/267041" target="_blank">"AB07045021.2" target="_blank">AB07045021.2 | NA              | NA             | -8.3118618466232   | -835.55001208142    | 2.042710460315e-22     | 1.4253012278129e-22  | Down in NR1_Metformin |
| AB07050300.1 | ca href="https://www.ncbi.nlm.nih.gov/gene/267041" target="_blank">"AB07050300.1" target="_blank">AB07050300.1 | NA              | NA             | 0.37228065538701   | 1.29411035668208    | 6.8695207515557e-05    | 0.015122910073521    | Up in NR1_Metformin   |
| AB07072345.1 | ca href="https://www.ncbi.nlm.nih.gov/gene/267041" target="_blank">"AB07072345.1" target="_blank">AB07072345.1 | NA              | NA             | -7.96486103788004  | -249.80541935087    | 7.2257257777338e-08    | 7.75803742556041e-07 | Down in NR1_Metformin |
| AC017058.1   | ca href="https://www.ncbi.nlm.nih.gov/gene/267041" target="_blank">"AC017058.1" target="_blank">AC017058.1     | NA              | NA             | -8.602207039186429 | -388.58068789745    | 4.4878884196615e-05    | 0.0002119186770405   | Down in NR1_Metformin |
| Acaca        | ca href="https://www.ncbi.nlm.nih.gov/gene/26581" target="_blank">"Acaca" target="_blank">Acaca                | protein_coding  | protein_coding | 0.418315884071401  | 1.32606666555055    | 1.11569102545635e-05   | 0.0038923670565975   | Up in NR1_Metformin   |
| Adgrd2       | ca href="https://www.ncbi.nlm.nih.gov/gene/171447" target="_blank">"Adgrd2" target="_blank">Adgrd2             | NA              | NA             | 0.311895013235584  | 1.2473715454412     | 0.000444447834278062   | 0.0365224087702692   | Up in NR1_Metformin   |
| Ank3         | ca href="https://www.ncbi.nlm.nih.gov/gene/267041" target="_blank">"Ank3" target="_blank">Ank3                 | protein_coding  | protein_coding | 0.345666035002839  | 1.207288881491      | 0.000848845711190902   | 0.0468947824309072   | Up in NR1_Metformin   |
| Ank3k1       | ca href="https://www.ncbi.nlm.nih.gov/gene/266062" target="_blank">"Ank3k1" target="_blank">Ank3k1             | protein_coding  | protein_coding | 0.318624336687007  | 1.2471402700732     | 0.00034572045888074    | 0.0234082929340207   | Up in NR1_Metformin   |
| Ank4         | ca href="https://www.ncbi.nlm.nih.gov/gene/267041" target="_blank">"Ank4" target="_blank">Ank4                 | protein_coding  | protein_coding | 0.468553665968713  | 1.38372319183786    | 3.0081071031706e-07    | 0.00711482529491967  | Up in NR1_Metformin   |
| Anp1f2       | ca href="https://www.ncbi.nlm.nih.gov/gene/267027" target="_blank">"Anp1f2" target="_blank">Anp1f2             | protein_coding  | protein_coding | 0.320071170457377  | 1.24369213295625    | 0.00051048176823148    | 0.0041961106720439   | Up in NR1_Metformin   |
| Atg16l1      | ca href="https://www.ncbi.nlm.nih.gov/gene/249697" target="_blank">"Atg16l1" target="_blank">Atg16l1           | NA              | NA             | -0.33787618811714  | -1.32330842597252   | 2.85444989697798e-05   | 0.0866034565473569   | Down in NR1_Metformin |
| Atxn1        | ca href="https://www.ncbi.nlm.nih.gov/gene/25249" target="_blank">"Atxn1" target="_blank">Atxn1                | protein_coding  | protein_coding | 0.378781023526217  | 1.262196146668187   | 2.88445245451691e-05   | 0.00711482529491967  | Up in NR1_Metformin   |
| Baz2b        | ca href="https://www.ncbi.nlm.nih.gov/gene/271762" target="_blank">"Baz2b" target="_blank">Baz2b               | protein_coding  | protein_coding | 1.5914402480347    | 3.12036881699025    | 0.0002258518170807     | 0.0274470519834497   | Up in NR1_Metformin   |
| Bp1          | ca href="https://www.ncbi.nlm.nih.gov/gene/264967" target="_blank">"Bp1" target="_blank">Bp1                   | protein_coding  | protein_coding | 0.33774811795428   | 1.2623874892033     | 0.0003454174151083     | 0.0227716868707897   | Up in NR1_Metformin   |
| Bp1l1        | ca href="https://www.ncbi.nlm.nih.gov/gene/267041" target="_blank">"Bp1l1" target="_blank">Bp1l1               | protein_coding  | protein_coding | 0.320344963822034  | 1.2573138758907     | 5.32098473041473e-05   | 0.00145717820132     | Up in NR1_Metformin   |
| Bt1          | ca href="https://www.ncbi.nlm.nih.gov/gene/267041" target="_blank">"Bt1" target="_blank">Bt1                   | protein_coding  | protein_coding | 0.203983782745182  | 1.24918203858004    | 0.0005991498550065     | 0.042021903364842    | Up in NR1_Metformin   |
| Bwt          | ca href="https://www.ncbi.nlm.nih.gov/gene/304061" target="_blank">"Bwt" target="_blank">Bwt                   | protein_coding  | protein_coding | 0.405427036030877  | 1.234480889113767   | 4.3503283284229e-05    | 0.0091883078186922   | Up in NR1_Metformin   |
| Bwn1         | ca href="https://www.ncbi.nlm.nih.gov/gene/267041" target="_blank">"Bwn1" target="_blank">Bwn1                 | protein_coding  | protein_coding | 0.38440411056582   | 1.2873500620578     | 0.0011325809671543     | 0.018615878157456    | Up in NR1_Metformin   |
| Cacna1d      | ca href="https://www.ncbi.nlm.nih.gov/gene/267041" target="_blank">"Cacna1d" target="_blank">Cacna1d           | protein_coding  | protein_coding | 0.4258769593743    | 1.3423050437832     | 2.9867220886873e-05    | 0.0115923310039953   | Up in NR1_Metformin   |
| Cank1        | ca href="https://www.ncbi.nlm.nih.gov/gene/267041" target="_blank">"Cank1" target="_blank">Cank1               | protein_coding  | protein_coding | 0.308902474660337  | 1.23878041245114    | 0.00077414293094492    | 0.00470700026073     | Up in NR1_Metformin   |
| Carni1       | ca href="https://www.ncbi.nlm.nih.gov/gene/267041" target="_blank">"Carni1" target="_blank">Carni1             | NA              | NA             | 0.38148730878426   | 1.2028841943019     | 0.0011664433025749     | 0.018844871409312    | Up in NR1_Metformin   |
| Cd2da        | ca href="https://www.ncbi.nlm.nih.gov/gene/26588" target="_blank">"Cd2da" target="_blank">Cd2da                | protein_coding  | protein_coding | 0.563003171980265  | 1.476263303374      | 2.9158122570326e-05    | 0.00711482529491967  | Up in NR1_Metformin   |
| Cdc141       | ca href="https://www.ncbi.nlm.nih.gov/gene/211133" target="_blank">"Cdc141" target="_blank">Cdc141             | protein_coding  | protein_coding | 0.37368798286205   | 1.2986427671206     | 0.00034186327397234    | 0.0234082929340207   | Up in NR1_Metformin   |
| Cdc80la      | ca href="https://www.ncbi.nlm.nih.gov/gene/265905" target="_blank">"Cdc80la" target="_blank">Cdc80la           | protein_coding  | protein_coding | 0.337387596978718  | 1.26346674812109    | 0.001926360308106      | 0.025873990570156    | Up in NR1_Metformin   |
| Ccn3         | ca href="https://www.ncbi.nlm.nih.gov/gene/264505" target="_blank">"Ccn3" target="_blank">Ccn3                 | protein_coding  | protein_coding | 1.39301728408178   | 2.82627371450243    | 0.0005040210587736     | 0.0041345106720439   | Up in NR1_Metformin   |
| Coj1         | ca href="https://www.ncbi.nlm.nih.gov/gene/267041" target="_blank">"Coj1" target="_blank">Coj1                 | protein_coding  | protein_coding | -0.3089030823883   | -1.2344710758224    | 0.00025040070787181    | 0.043831322717712    | Down in NR1_Metformin |
| Ctcf2        | ca href="https://www.ncbi.nlm.nih.gov/gene/28428" target="_blank">"Ctcf2" target="_blank">Ctcf2                | protein_coding  | protein_coding | 0.306776789714996  | 1.2313806213988     | 0.000345870356667      | 0.0234082929340207   | Up in NR1_Metformin   |
| Cpe30        | ca href="https://www.ncbi.nlm.nih.gov/gene/26530" target="_blank">"Cpe30" target="_blank">Cpe30                | protein_coding  | protein_coding | 0.38817671488846   | 1.2884986748963     | 0.00022215484671757    | 0.027445055878967    | Up in NR1_Metformin   |
| Ctcf         | ca href="https://www.ncbi.nlm.nih.gov/gene/265671" target="_blank">"Ctcf" target="_blank"> Ctcf                | protein_coding  | protein_coding | 0.523029147103731  | 1.4369992452364     | 2.008418719602783      | 0.03941078778309     | Down in NR1_Metformin |
| Clu          | ca href="https://www.ncbi.nlm.nih.gov/gene/26581" target="_blank">"Clu" target="_blank">Clu                    | protein_coding  | protein_coding | 0.523029147103731  | 1.4369992452364     | 2.008418719602783      | 0.03941078778309     | Down in NR1_Metformin |
| Cmpk2        | ca href="https://www.ncbi.nlm.nih.gov/gene/214007" target="_blank">"Cmpk2" target="_blank">Cmpk2               | protein_coding  | protein_coding | 0.449690712596908  | 1.3612871645033     | 1.86287486238556e-05   | 0.00115027914990273  | Up in NR1_Metformin   |
| Cnt1a2       | ca href="https://www.ncbi.nlm.nih.gov/gene/284273" target="_blank">"Cnt1a2" target="_blank">Cnt1a2             | protein_coding  | protein_coding | 0.567876330945852  | 1.482138517451      | 0.0005697535472314     | 0.025873990570156    | Up in NR1_Metformin   |
| Cnt1a1       | ca href="https://www.ncbi.nlm.nih.gov/gene/26393" target="_blank">"Cnt1a1" target="_blank">Cnt1a1              | protein_coding  | protein_coding | 2.2001373848703    | 4.5952330003297     | 0.00023678624874775    | 0.02800333811844     | Up in NR1_Metformin   |
| Coll2a2      | ca href="https://www.ncbi.nlm.nih.gov/gene/265135" target="_blank">"Coll2a2" target="_blank">Coll2a2           | protein_coding  | protein_coding | -0.875246142319176 | -1.8432101845893    | 0.00147071638884167    | 0.023685520098619    | Down in NR1_Metformin |
| Cop2         | ca href="https://www.ncbi.nlm.nih.gov/gene/265083" target="_blank">"Cop2" target="_blank">Cop2                 | protein_coding  | protein_coding | -0.33030772969691  | -1.25774348202434   | 0.00039390409495287    | 0.023010663280206    | Down in NR1_Metformin |
| Cvpe         | ca href="https://www.ncbi.nlm.nih.gov/gene/267041" target="_blank">"Cvpe" target="_blank">Cvpe                 | protein_coding  | protein_coding | 0.316381074332806  | -1.24517720764384   | 0.0003386544900158     | 0.033710438722941    | Down in NR1_Metformin |
| Dhp          | ca href="https://www.ncbi.nlm.nih.gov/gene/264309" target="_blank">"Dhp" target="_blank">Dhp                   | protein_coding  | protein_coding | -0.460895684864095 | -1.27639607617878   | 2.8638040738024e-06    | 0.0115923310039953   | Down in NR1_Metformin |
| Dhs          | ca href="https://www.ncbi.nlm.nih.gov/gene/288903" target="_blank">"Dhs" target="_blank">Dhs                   | protein_coding  | protein_coding | -0.30341100100733  | -1.23408685385      | 0.00033834503415519    | 0.033710438722941    | Down in NR1_Metformin |
| Dit          | ca href="https://www.ncbi.nlm.nih.gov/gene/265430" target="_blank">"Dit" target="_blank">Dit                   | NA              | NA             | -0.547712329643342 | -1.46118950191788   | 1.9932579147629e-07    | 0.0015453266596661   | Down in NR1_Metformin |
| Dna1         | ca href="https://www.ncbi.nlm.nih.gov/gene/261613" target="_blank">"Dna1" target="_blank">Dna1                 | protein_coding  | protein_coding | 0.320344963822034  | 1.2573138758907     | 5.32098473041473e-05   | 0.00470700026073     | Up in NR1_Metformin   |
| Eno1         | ca href="https://www.ncbi.nlm.nih.gov/gene/267041" target="_blank">"Eno1" target="_blank">Eno1                 | protein_coding  | protein_coding | -1.44858713418305  | -2.7294802132038    | 3.906856412214e-05     | 5.44336882681447e-18 | Down in NR1_Metformin |
| Emg          | ca href="https://www.ncbi.nlm.nih.gov/gene/264496" target="_blank">"Emg" target="_blank">Emg                   | protein_coding  | protein_coding | 0.37459564200041   | 1.29638266126260    | 0.00051807043748117    | 0.0401345106720439   | Up in NR1_Metformin   |
| Emy          | ca href="https://www.ncbi.nlm.nih.gov/gene/261602" target="_blank">"Emy" target="_blank">Emy                   | NA              | NA             | 0.30927252962693   | 1.2396273912315     | 0.0002653073235001     | 0.029151829045737    | Up in NR1_Metformin   |
| EP300        | ca href="https://www.ncbi.nlm.nih.gov/gene/267041" target="_blank">"EP300" target="_blank">EP300               | protein_coding  | protein_coding | 0.384040286735813  | 1.3049118895142     | 0.00524250584681e-06   | 0.0242311729338087   | Up in NR1_Metformin   |
| EphA15       | ca href="https://www.ncbi.nlm.nih.gov/gene/264732" target="_blank">"EphA15" target="_blank">EphA15             | protein_coding  | protein_coding | 0.310786003516913  | 1.2421014805683     | 0.00084187960118703    | 0.04245724481749     | Up in NR1_Metformin   |
| Eppaf1       | ca href="https://www.ncbi.nlm.nih.gov/gene/267041" target="_blank">"Eppaf1" target="_blank">Eppaf1             | protein_coding  | protein_coding | 0.63969630516913   | 1.87709643757686    | 0.000443044854174864   | 0.033710438722941    | Up in NR1_Metformin   |
| Fabp1        | ca href="https://www.ncbi.nlm.nih.gov/gene/267041" target="_blank">"Fabp1" target="_blank">Fabp1               | protein_coding  | protein_coding | -0.487241554812687 | -1.40717649135587   | 0.00061409709696e-05   | 0.013276231962186    | Down in NR1_Metformin |
| Fabp2        | ca href="https://www.ncbi.nlm.nih.gov/gene/265024" target="_blank">"Fabp2" target="_blank">Fabp2               | protein_coding  | protein_coding | 0.358510268159035  | 1.38719848023173    | 1.41115914161027e-05   | 0.00711482529491967  | Up in NR1_Metformin   |
| Foxo1        | ca href="https://www.ncbi.nlm.nih.gov/gene/266157" target="_blank">"Foxo1" target="_blank">Foxo1               | protein_coding  | protein_coding | 0.458995657869779  | 1.27455025918106    | 0.00121741305586527051 | 0.0091883078186922   | Up in NR1_Metformin   |
| Fox1         | ca href="https://www.ncbi.nlm.nih.gov/gene/265661" target="_blank">"Fox1" target="_blank">Fox1                 | protein_coding  | protein_coding | 0.7815540887004    | 1.6980267103517     | 0.0075587785657514     | 0.047862762061071    | Up in NR1_Metformin   |
| Fos          | ca href="https://www.ncbi.nlm.nih.gov/gene/261532" target="_blank">"Fos" target="_blank">Fos                   | protein_coding  | protein_coding | 1.01642170300309   | -2.02289520264      | 9.735897103204e-06     | 1.143100507524e-07   | Down in NR1_Metformin |
| Frbz         | ca href="https://www.ncbi.nlm.nih.gov/gene/265493" target="_blank">"Frbz" target="_blank">Frbz                 | protein_coding  | protein_coding | -0.33521877107785  | -1.26158896958583   | 0.00101751243733803    | 0.023751043592312    | Down in NR1_Metformin |
| Fundc2       | ca href="https://www.ncbi.nlm.nih.gov/gene/266128" target="_blank">"Fundc2" target="_blank">Fundc2             | protein_coding  | protein_coding | -0.3051930081457   | -1.2355644412374    | 0.000209918174833066   | 0.030471809826982    | Down in NR1_Metformin |
| Gaf1         | ca href="https://www.ncbi.nlm.nih.gov/gene/264387" target="_blank">"Gaf1" target="_blank">Gaf1                 | protein_coding  | protein_coding | 0.472292243987285  | 1.3873119568137     | 0.0013155807035852     | 0.0202697189159705   | Up in NR1_Metformin   |
| Qip          | ca href="https://www.ncbi.nlm.nih.gov/gene/264392" target="_blank">"Qip" target="_blank">Qip                   | protein_coding  | protein_coding | -0.823066117992    | -1.76918235418922   | 7.0897307132554e-06    | 0.029989303702384    | Down in NR1_Metformin |
| Qsox1        | ca href="https://www.ncbi.nlm.nih.gov/gene/263928" target="_blank">"Qsox1" target="_blank">Qsox1               | protein_coding  | protein_coding | -0.45371274216058  | -1.36959023995183   | 1.15484289848759e-05   | 0.003988306408134    | Down in NR1_Metformin |
| Qsmad1b      | ca href="https://www.ncbi.nlm.nih.gov/gene/260044" target="_blank">"Qsmad1b" target="_blank">Qsmad1b           | protein_coding  | protein_coding | 0.32549535248066   | 1.25309481753132    | 0.0003840173884617     | 0.032771898370797    | Up in NR1_Metformin   |
| Gm1          | ca href="https://www.ncbi.nlm.nih.gov/gene/264414" target="_blank">"Gm1" target="_blank">Gm1                   | protein_coding  | protein_coding | 0.358238480167285  | 1.2397076652147     | 0.0002783811673729     | 0.011551592543026    | Up in NR1_Metformin   |
| Hnz1         | ca href="https://www.ncbi.nlm.nih.gov/gene/267773" target="_blank">"Hnz1" target="_blank">Hnz1                 | protein_coding  | protein_coding | 0.308902710201207  | 1.2328024520564     | 0.00035686958165745    | 0.005413211790455    | Up in NR1_Metformin   |
| Hpk2         | ca href="https://www.ncbi.nlm.nih.gov/gene/263242" target="_blank">"Hpk2" target="_blank">Hpk2                 | protein_coding  | protein_coding | 0.41828815110212   | 1.306340060619      | 0.001772378068618      | 0.024550323417257    | Up in NR1_Metformin   |
| Hwp2         | ca href="https://www.ncbi.nlm.nih.gov/gene/28721" target="_blank">"Hwp2" target="_blank">Hwp2                  | protein_coding  | protein_coding | 0.318655783243039  | 1.24570784453231    | 0.00028345079913349    | 0.029151829045737    | Up in NR1_Metformin   |
| Hypn         | ca href="https://www.ncbi.nlm.nih.gov/gene/271160" target="_blank">"Hypn" target="_blank">Hypn                 | protein_coding  | protein_coding | -0.37501662080749  | -1.26958449519185   | 0.00781270485113e-05   | 0.0152782331682166   | Down in NR1_Metformin |
| Hoxd         | ca href="https://www.ncbi.nlm.nih.gov/gene/260217" target="_blank">"Hoxd" target="_blank">Hoxd                 | protein_coding  | protein_coding | 0.576287230616478  | 1.4872293642391     | 0.00022808435320025    | 0.027445055878967    | Up in NR1_Metformin   |
| Igfb1        | ca href="https://www.ncbi.nlm.nih.gov/gene/267041" target="_blank">"Igfb1" target="_blank"&                    |                 |                |                    |                     |                        |                      |                       |

|           |                                                                                                                           |          |                 |      |                                                                          |                         |                 |                     |                      |                       |                     |                    |
|-----------|---------------------------------------------------------------------------------------------------------------------------|----------|-----------------|------|--------------------------------------------------------------------------|-------------------------|-----------------|---------------------|----------------------|-----------------------|---------------------|--------------------|
| Pnel      | <a href="https://www.ncbi.nlm.nih.gov/geo/2/mim-36218">ca href="https://www.ncbi.nlm.nih.gov/geo/2/mim-36218"</a>         | target_3 | blank">36218    | </a> | permeascope protein                                                      | protein, coding         | protein, coding | -0.5441114398943    | -1.458121733757093   | 0.000423620078230437  | 0.0355658041921552  | Down in NR_Melanin |
| Pnl2a     | <a href="https://www.ncbi.nlm.nih.gov/geo/2/mim-690966">ca href="https://www.ncbi.nlm.nih.gov/geo/2/mim-690966"</a>       | target_3 | blank">690966   | </a> | RNA polymerase II, and III subunit E                                     | protein, coding         | protein, coding | 0.31225924386716    | -1.241627670687068   | 0.0002801672867068    | 0.027440556579897   | Down in NR_Melanin |
| Pnl12b    | <a href="https://www.ncbi.nlm.nih.gov/geo/2/mim-304813">ca href="https://www.ncbi.nlm.nih.gov/geo/2/mim-304813"</a>       | target_1 | blank">304813   | </a> | protein phosphatase 1, regulatory subunit 12B                            | protein, coding         | protein, coding | 0.30480618288874    | 1.235362466596658    | 0.00048392433958931   | 0.039410578778309   | Up in NR_Melanin   |
| Pp1r1b    | <a href="https://www.ncbi.nlm.nih.gov/geo/2/mim-360616">ca href="https://www.ncbi.nlm.nih.gov/geo/2/mim-360616"</a>       | target_1 | blank">360616   | </a> | protein phosphatase 1, regulatory (inhibitor) subunit 1B                 | protein, coding         | protein, coding | 0.55272797059649    | -1.467893496796539   | 5.2202762414631e-07   | 0.00034244840272764 | Down in NR_Melanin |
| Ppm1      | <a href="https://www.ncbi.nlm.nih.gov/geo/2/mim-306871">ca href="https://www.ncbi.nlm.nih.gov/geo/2/mim-306871"</a>       | target_1 | blank">306871   | </a> | PRKSET domain 1                                                          | protein, coding         | protein, coding | 0.47309983912828    | 1.3938737082777769   | 4.42982679514258e-05  | 0.0362191687070485  | Up in NR_Melanin   |
| Pps2      | <a href="https://www.ncbi.nlm.nih.gov/geo/2/mim-312912">ca href="https://www.ncbi.nlm.nih.gov/geo/2/mim-312912"</a>       | target_1 | blank">312912   | </a> | phosphatidylinositol-3,4,5-trisphosphate-dependent Rac exchange factor 2 | protein, coding         | protein, coding | 0.38730129636793    | 1.30471006580897     | 0.001307300698304277  | 0.022260689304277   | Up in NR_Melanin   |
| Ppk3      | <a href="https://www.ncbi.nlm.nih.gov/geo/2/mim-85430">ca href="https://www.ncbi.nlm.nih.gov/geo/2/mim-85430"</a>         | target_1 | blank">85430    | </a> | protein kinase C, theta                                                  | protein, coding         | protein, coding | 0.76596404847795    | 7.26354014809729e-05 | 0.013515027055597     | 0.0001307305597     | Down in NR_Melanin |
| Pp1a      | <a href="https://www.ncbi.nlm.nih.gov/geo/2/mim-306380">ca href="https://www.ncbi.nlm.nih.gov/geo/2/mim-306380"</a>       | target_1 | blank">306380   | </a> | protein kinase and Sec7 domain containing 3                              | protein, coding         | protein, coding | 1.11716020315869    | 2.16023590323071     | 1.591729123223982e-16 | 7.4031686531988e-13 | Up in NR_Melanin   |
| Ppm1b     | <a href="https://www.ncbi.nlm.nih.gov/geo/2/mim-94198">ca href="https://www.ncbi.nlm.nih.gov/geo/2/mim-94198"</a>         | target_1 | blank">94198    | </a> | proteasome 20S subunit beta 1                                            | protein, coding         | protein, coding | -0.36127834220331   | -1.28465061688499    | 0.00042835682931085   | 0.039410578778309   | Down in NR_Melanin |
| Ppm1b     | <a href="https://www.ncbi.nlm.nih.gov/geo/2/mim-58854">ca href="https://www.ncbi.nlm.nih.gov/geo/2/mim-58854"</a>         | target_1 | blank">58854    | </a> | proteasome 20S subunit beta 4                                            | protein, coding         | protein, coding | -0.38078287183745   | -1.30224545782947    | 0.00054890248853792   | 0.047403106702439   | Down in NR_Melanin |
| Ppm1b     | <a href="https://www.ncbi.nlm.nih.gov/geo/2/mim-29425">ca href="https://www.ncbi.nlm.nih.gov/geo/2/mim-29425"</a>         | target_1 | blank">29425    | </a> | proteasome 20S subunit beta 5                                            | protein, coding         | protein, coding | -0.33174598070711   | -1.25835344793025    | 0.000221559306840538  | 0.027440556579897   | Down in NR_Melanin |
| Ppm4      | <a href="https://www.ncbi.nlm.nih.gov/geo/2/mim-498433">ca href="https://www.ncbi.nlm.nih.gov/geo/2/mim-498433"</a>       | target_1 | blank">498433   | </a> | proteasome activator subunit 4                                           | protein, coding         | protein, coding | 0.329493163378226   | 1.5555716772879      | 0.000408542254555897  | 0.0349777550134473  | Up in NR_Melanin   |
| Pp1d      | <a href="https://www.ncbi.nlm.nih.gov/geo/2/mim-25528">ca href="https://www.ncbi.nlm.nih.gov/geo/2/mim-25528"</a>         | target_1 | blank">25528    | </a> | prostaglandin D2 synthase                                                | protein, coding         | protein, coding | -0.32087102496631   | -1.24907404012854    | 0.00014894780031688   | 0.020094575798312   | Down in NR_Melanin |
| Ralac1    | <a href="https://www.ncbi.nlm.nih.gov/geo/2/mim-83583">ca href="https://www.ncbi.nlm.nih.gov/geo/2/mim-83583"</a>         | target_1 | blank">83583    | </a> | Rac acceptor 1                                                           | protein, coding         | protein, coding | -0.33058557717121   | -1.29270748321827    | 1.3758911700108e-05   | 0.0004465388933387  | Down in NR_Melanin |
| Rh1a1     | <a href="https://www.ncbi.nlm.nih.gov/geo/2/mim-660581">ca href="https://www.ncbi.nlm.nih.gov/geo/2/mim-660581"</a>       | target_1 | blank">660581   | </a> | RNA binding motif protein 41                                             | protein, coding         | protein, coding | 0.553093594227688   | 1.46503851167938     | 6.15914469000822e-05  | 0.0116149854150944  | Up in NR_Melanin   |
| Rh1p      | <a href="https://www.ncbi.nlm.nih.gov/geo/2/mim-25058">ca href="https://www.ncbi.nlm.nih.gov/geo/2/mim-25058"</a>         | target_1 | blank">25058    | </a> | retinol binding protein 1                                                | protein, coding         | protein, coding | -0.403716802319875  | -1.3214148559804     | 3.7633817602519e-05   | 0.0006986394851089  | Down in NR_Melanin |
| Rch1      | <a href="https://www.ncbi.nlm.nih.gov/geo/2/mim-680586">ca href="https://www.ncbi.nlm.nih.gov/geo/2/mim-680586"</a>       | target_1 | blank">680586   | </a> | ring finger and CCHC-type domains 1                                      | processed trans protein | processed trans | 0.29138491455746    | 1.202608009813       | 0.000495404486238886  | 0.03974886378807    | Up in NR_Melanin   |
| Rex3      | <a href="https://www.ncbi.nlm.nih.gov/geo/2/mim-309812">ca href="https://www.ncbi.nlm.nih.gov/geo/2/mim-309812"</a>       | target_1 | blank">309812   | </a> | REV3 like, DNA directed polymerase zeta catalytic subunit                | protein, coding         | protein, coding | 0.33748691457846    | 1.63936565125919     | 0.0002018193539554829 | 0.0205203474288032  | Up in NR_Melanin   |
| Rh7       | <a href="https://www.ncbi.nlm.nih.gov/geo/2/mim-315804">ca href="https://www.ncbi.nlm.nih.gov/geo/2/mim-315804"</a>       | target_1 | blank">315804   | </a> | regulatory factor X, 7                                                   | protein, coding         | protein, coding | 0.3148019132604592  | 1.24394036863151     | 0.000427607827460037  | 0.0285509473511214  | Up in NR_Melanin   |
| ROD165816 | <a href="https://www.ncbi.nlm.nih.gov/geo/2/mim-498981">ca href="https://www.ncbi.nlm.nih.gov/geo/2/mim-498981"</a>       | target_1 | blank">498981   | </a> | ROD165816                                                                | protein, coding         | protein, coding | 0.45041013004959    | 1.36642863402771     | 0.0003197062699936    | 0.030791948517529   | Up in NR_Melanin   |
| Rlor      | <a href="https://www.ncbi.nlm.nih.gov/geo/2/mim-310131">ca href="https://www.ncbi.nlm.nih.gov/geo/2/mim-310131"</a>       | target_1 | blank">310131   | </a> | RPTOR independent companion of MTOR, complex 2                           | protein, coding         | protein, coding | 0.33745710190044    | 1.353748317031192    | 0.00024960341387515   | 0.0238550947811214  | Up in NR_Melanin   |
| Rim       | <a href="https://www.ncbi.nlm.nih.gov/geo/2/mim-317241">ca href="https://www.ncbi.nlm.nih.gov/geo/2/mim-317241"</a>       | target_1 | blank">317241   | </a> | ring finger protein, LIM domain interacting                              | protein, coding         | protein, coding | 0.54382344459702    | 1.45733090011869     | 3.78933096060011e-05  | 0.00080966394831059 | Up in NR_Melanin   |
| Rh1       | <a href="https://www.ncbi.nlm.nih.gov/geo/2/mim-10056501">ca href="https://www.ncbi.nlm.nih.gov/geo/2/mim-10056501"</a>   | target_1 | blank">10056501 | </a> | nonmuscle arthropodin inhibitor 1                                        | protein, coding         | protein, coding | -0.373944876502589  | -1.2970681848233     | 0.00019650097570309   | 0.026068544374817   | Down in NR_Melanin |
| Rom1      | <a href="https://www.ncbi.nlm.nih.gov/geo/2/mim-306201">ca href="https://www.ncbi.nlm.nih.gov/geo/2/mim-306201"</a>       | target_1 | blank">306201   | </a> | retinol outer segment membrane protein 1                                 | protein, coding         | protein, coding | -0.259595056178803  | -1.197130069633174   | 0.000613993838859062  | 0.0438313273737172  | Down in NR_Melanin |
| Rp65      | <a href="https://www.ncbi.nlm.nih.gov/geo/2/mim-88626">ca href="https://www.ncbi.nlm.nih.gov/geo/2/mim-88626"</a>         | target_1 | blank">88626    | </a> | retinol isomerohydrolase PPE65                                           | protein, coding         | protein, coding | -0.1031863065030518 | -0.047602660203518   | 2.19886578793573e-11  | 6.1396354112863e-08 | Down in NR_Melanin |
| Rp221     | <a href="https://www.ncbi.nlm.nih.gov/geo/2/mim-381923">ca href="https://www.ncbi.nlm.nih.gov/geo/2/mim-381923"</a>       | target_1 | blank">381923   | </a> | retinol protein L22 like 1                                               | protein, coding         | protein, coding | -0.447230232801009  | -1.3634201716239     | 2.97016479484131e-05  | 0.00711485339475987 | Down in NR_Melanin |
| Rp391     | <a href="https://www.ncbi.nlm.nih.gov/geo/2/mim-497850">ca href="https://www.ncbi.nlm.nih.gov/geo/2/mim-497850"</a>       | target_1 | blank">497850   | </a> | retinol protein L39-like                                                 | protein, coding         | protein, coding | -2.1795321401167    | -4.5239216377576     | 0.000191967492624082  | 0.0258739990870156  | Down in NR_Melanin |
| Rp391     | <a href="https://www.ncbi.nlm.nih.gov/geo/2/mim-140681">ca href="https://www.ncbi.nlm.nih.gov/geo/2/mim-140681"</a>       | target_1 | blank">140681   | </a> | retinol protein L39-like                                                 | protein, coding         | protein, coding | -0.16682914085187   | -1.289538516551577   | 0.000186976045971908  | 0.0255807526131174  | Down in NR_Melanin |
| Rp10      | <a href="https://www.ncbi.nlm.nih.gov/geo/2/mim-81773">ca href="https://www.ncbi.nlm.nih.gov/geo/2/mim-81773"</a>         | target_1 | blank">81773    | </a> | retinol protein S10                                                      | protein, coding         | protein, coding | -0.36444828769995   | -1.28788621735931    | 0.00027237167652148   | 0.029151852984757   | Down in NR_Melanin |
| Rp45      | <a href="https://www.ncbi.nlm.nih.gov/geo/2/mim-29285">ca href="https://www.ncbi.nlm.nih.gov/geo/2/mim-29285"</a>         | target_1 | blank">29285    | </a> | retinol protein S15                                                      | protein, coding         | protein, coding | -0.30178725108504   | -1.23267353726754    | 0.0006272569730584    | 0.0438313273737172  | Down in NR_Melanin |
| Rp17      | <a href="https://www.ncbi.nlm.nih.gov/geo/2/mim-29288">ca href="https://www.ncbi.nlm.nih.gov/geo/2/mim-29288"</a>         | target_1 | blank">29288    | </a> | retinol protein S17                                                      | protein, coding         | protein, coding | -0.31343658951246   | -1.24286878272146    | 0.00071614088912575   | 0.047589366388833   | Down in NR_Melanin |
| Rp181     | <a href="https://www.ncbi.nlm.nih.gov/geo/2/mim-10036079">ca href="https://www.ncbi.nlm.nih.gov/geo/2/mim-10036079"</a>   | target_1 | blank">10036079 | </a> | retinol protein S18-like 1                                               | protein, coding         | protein, coding | -0.432001100714     | -1.94730109557795    | 5.8407484277848e-06   | 0.00271682910572456 | Down in NR_Melanin |
| Rp192     | <a href="https://www.ncbi.nlm.nih.gov/geo/2/mim-29287">ca href="https://www.ncbi.nlm.nih.gov/geo/2/mim-29287"</a>         | target_1 | blank">29287    | </a> | retinol protein S19-like2                                                | protein, coding         | protein, coding | -0.318689417503828  | -1.2471970865363     | 0.00046374062111357   | 0.0386459619867904  | Down in NR_Melanin |
| Rp1       | <a href="https://www.ncbi.nlm.nih.gov/geo/2/mim-295145">ca href="https://www.ncbi.nlm.nih.gov/geo/2/mim-295145"</a>       | target_1 | blank">295144   | </a> | reelin family peptide receptor 1                                         | protein, coding         | protein, coding | 1.07396233008413    | 2.10373390307052     | 0.000384097970869759  | 0.0337104392722941  | Up in NR_Melanin   |
| Rp2       | <a href="https://www.ncbi.nlm.nih.gov/geo/2/mim-685650">ca href="https://www.ncbi.nlm.nih.gov/geo/2/mim-685650"</a>       | target_1 | blank">685650   | </a> | ryanodine receptor 2                                                     | protein, coding         | protein, coding | 0.463864051374495   | 1.37623004745487     | 0.000260386385956403  | 0.026758686811513   | Up in NR_Melanin   |
| Sacs      | <a href="https://www.ncbi.nlm.nih.gov/geo/2/mim-305940">ca href="https://www.ncbi.nlm.nih.gov/geo/2/mim-305940"</a>       | target_1 | blank">305940   | </a> | sarcolin molecular chaperone                                             | protein, coding         | protein, coding | 0.443824506814497   | 1.38020019537667     | 2.55597420910887e-05  | 0.00617186398491891 | Up in NR_Melanin   |
| Sag       | <a href="https://www.ncbi.nlm.nih.gov/geo/2/mim-25539">ca href="https://www.ncbi.nlm.nih.gov/geo/2/mim-25539"</a>         | target_1 | blank">25539    | </a> | S-arabin visual arrestin                                                 | protein, coding         | protein, coding | -0.393924653315731  | -1.31341655504429    | 9.5737886331186e-06   | 0.00351619590096891 | Down in NR_Melanin |
| Samd11    | <a href="https://www.ncbi.nlm.nih.gov/geo/2/mim-102549710">ca href="https://www.ncbi.nlm.nih.gov/geo/2/mim-102549710"</a> | target_1 | blank">10254971 | </a> | shale alpha domain containing 11                                         | protein, coding         | protein, coding | 0.3887407768203958  | 1.3065306746784385   | 8.278561866157e-05    | 0.014811861005419   | Up in NR_Melanin   |
| Sk1       | <a href="https://www.ncbi.nlm.nih.gov/geo/2/mim-113907">ca href="https://www.ncbi.nlm.nih.gov/geo/2/mim-113907"</a>       | target_1 | blank">113907   | </a> | SK1 domain binding kinase 1                                              | protein, coding         | protein, coding | 0.40122881102028    | 1.32063319177884     | 0.000263842649640085  | 0.029151852984757   | Up in NR_Melanin   |
| Srda      | <a href="https://www.ncbi.nlm.nih.gov/geo/2/mim-24766">ca href="https://www.ncbi.nlm.nih.gov/geo/2/mim-24766"</a>         | target_1 | blank">24766    | </a> | sodium voltage-gated channel alpha subunit 2                             | protein, coding         | protein, coding | 0.328551326292934   | 1.25575176110652     | 0.00015489466612179   | 0.022353248100304   | Up in NR_Melanin   |
| Sema3c    | <a href="https://www.ncbi.nlm.nih.gov/geo/2/mim-170698">ca href="https://www.ncbi.nlm.nih.gov/geo/2/mim-170698"</a>       | target_1 | blank">170698   | </a> | sodium voltage-gated channel alpha subunit 8                             | protein, coding         | protein, coding | 0.40581657818822    | 1.3257571950347      | 8.47387157041246e-06  | 0.0022198114520942  | Up in NR_Melanin   |
| Serx      | <a href="https://www.ncbi.nlm.nih.gov/geo/2/mim-362096">ca href="https://www.ncbi.nlm.nih.gov/geo/2/mim-362096"</a>       | target_1 | blank">362096   | </a> | semaprofin 3C                                                            | protein, coding         | protein, coding | 0.328551326292934   | 1.25575176110652     | 0.00015489466612179   | 0.022353248100304   | Up in NR_Melanin   |
| Sb1a5     | <a href="https://www.ncbi.nlm.nih.gov/geo/2/mim-680891">ca href="https://www.ncbi.nlm.nih.gov/geo/2/mim-680891"</a>       | target_1 | blank">680891   | </a> | splicing factor 3b, subunit 5                                            | protein, coding         | protein, coding | -0.41435231556425   | -1.33270027171866    | 2.5804063427248e-05   | 0.0067845509168519  | Down in NR_Melanin |
| Sk1       | <a href="https://www.ncbi.nlm.nih.gov/geo/2/mim-59329">ca href="https://www.ncbi.nlm.nih.gov/geo/2/mim-59329"</a>         | target_1 | blank">59329    | </a> | sk1-nucleic kinase 1                                                     | protein, coding         | protein, coding | -0.688276591464404  | -1.62356673102099    | 0.00047996900505339   | 0.039410578778309   | Down in NR_Melanin |
| Sc16a8    | <a href="https://www.ncbi.nlm.nih.gov/geo/2/mim-65200">ca href="https://www.ncbi.nlm.nih.gov/geo/2/mim-65200"</a>         | target_1 | blank">65200    | </a> | soluble carrier family 1 member 8                                        | protein, coding         | protein, coding | -0.836203535686803  | -1.9150598348161     | 0.000627666589503228  | 0.0438313273737172  | Down in NR_Melanin |
| Sc1a7     | <a href="https://www.ncbi.nlm.nih.gov/geo/2/mim-117955">ca href="https://www.ncbi.nlm.nih.gov/geo/2/mim-117955"</a>       | target_1 | blank">117955   | </a> | solite carrier family 4 member 7                                         | protein, coding         | protein, coding | 0.4071459095516663  | 1.3265989418981      | 0.000561949014987147  | 0.0419538695341454  | Up in NR_Melanin   |
| Sc1a13    | <a href="https://www.ncbi.nlm.nih.gov/geo/2/mim-171163">ca href="https://www.ncbi.nlm.nih.gov/geo/2/mim-171163"</a>       | target_1 | blank">171163   | </a> | solite carrier family 5 member 13                                        | protein, coding         | protein, coding | -1.35655811305058   | -2.5607352601992     | 2.043570108774e-05    | 0.0059397626303203  | Down in NR_Melanin |
| Sc1a8     | <a href="https://www.ncbi.nlm.nih.gov/geo/2/mim-84551">ca href="https://www.ncbi.nlm.nih.gov/geo/2/mim-84551"</a>         | target_1 | blank">84551    | </a> | solite carrier family 1 member 8                                         | protein, coding         | protein, coding | 0.324257959420752   | 1.52025958420752     | 0.000228110246584938  | 0.027440556579897   | Up in NR_Melanin   |
| Sc1a14    | <a href="https://www.ncbi.nlm.nih.gov/geo/2/mim-170698">ca href="https://www.ncbi.nlm.nih.gov/geo/2/mim-170698"</a>       | target_1 | blank">170698   | </a> | solite carrier organic anion transporter family, member 1a4              | protein, coding         | protein, coding | 0.43462319771852    | -1.33187879065622    | 9.01473298710651e-05  | 0.012792531682186   | Down in NR_Melanin |
| Scp1      | <a href="https://www.ncbi.nlm.nih.gov/geo/2/mim-313588">ca href="https://www.ncbi.nlm.nih.gov/geo/2/mim-313588"</a>       | target_1 | blank">313588   | </a> | Srsd nuclear interacting protein 1                                       | protein, coding         | protein, coding | 0.80973704923504    | 1.8787038134008      | 0.000150446568945465  | 0.022098754798312   | Up in NR_Melanin   |
| Scap      | <a href="https://www.ncbi.nlm.nih.gov/geo/2/mim-361652">ca href="https://www.ncbi.nlm.nih.gov/geo/2/mim-361652"</a>       | target_1 | blank">361652   | </a> | Src2-related CRBBP activator protein                                     | protein, coding         | protein, coding | 0.353888628413288   | 1.2789000792542      | 0.000398515769697854  | 0.0345421597068281  | Up in NR_Melanin   |
| Scm2      | <a href="https://www.ncbi.nlm.nih.gov/geo/2/mim-302659">ca href="https://www.ncbi.nlm.nih.gov/geo/2/mim-302659"</a>       | target_1 | blank">302659   | </a> | serine arginine repetitive matrix 2                                      | protein, coding         | protein, coding | 0.35886826413288    | 1.24500658181369     | 0.000504530248129601  | 0.023607703480906   | Up in NR_Melanin   |
| Scn1b     | <a href="https://www.ncbi.nlm.nih.gov/geo/2/mim-891920">ca href="https://www.ncbi.nlm.nih.gov/geo/2/mim-891920"</a>       | target_1 | blank">891920   | </a> | STAR-related lipid transfer domain containing 9                          | protein, coding         | protein, coding | 0.4153551761760508  | 1.33190027109717     | 4.15700386171827e-06  | 0.0020723696530538  | Up in NR_Melanin   |
| Scn6      | <a href="https://www.ncbi.nlm.nih.gov/geo/2/mim-363071">ca href="https://www.ncbi.nlm.nih.gov/geo/2/mim-363071"</a>       | target_1 | blank">363071   | </a> | signaling receptor and transporter of retinoic STRA6                     | protein, coding         | protein, coding | 0.71988819693751    | 1.643748924338       | 0.000510419003568482  | 0.0401345105702439  | Down in NR_Melanin |
| Scn11     | <a href="https://www.ncbi.nlm.nih.gov/geo/2/mim-289993">ca href="https://www.ncbi.nlm.nih</a>                             |          |                 |      |                                                                          |                         |                 |                     |                      |                       |                     |                    |
